# Supplementary material for: Hydrogel-based 3D fabrication of multiple replicas with varying sizes and materials from a single template via iterative shrinking
Source: Royal Society of Chemistry journal article supplement (doi:10.1039/d4sm00835a), 2024-01-01
Supplement: d4sm00835a1.xlsx [file d4sm00835a1.xlsx]

## Sheet: Fig.2a
	Linear length relative to before shrinkage (%)	Standard deviation
AAm_5%	38.4444	0.71943
AAm_10%	44.7143	0.53927
AAm_15%	50.9682	0.30117
AAm_20%	54.9365	0.24858
AAm_25%	59.2857	0.27664

## Sheet: Fig.2c
Length ratio relative to A
AAm_5%	AAm_15%	AAm_25%
0.9675	1.00908	0.9988
0.95996	1.00025	1.00417
1.07651	1.0073	1.00393
1.13591	0.99295	1.01018
0.94542	0.99327	0.99724
0.85301	0.99944	1.00186

## Sheet: Fig.2d
Angle
AAm_5%	AAm_15%	AAm_25%
62.714	59.685	59.873
59.084	60.688	59.753
58.437	59.724	60.373
54.04	60.038	59.389
60.404	60.735	59.983
65.329	59.227	60.628
67.371	60.112	60.141
60.767	59.668	59.728
51.901	60.117	60.131

## Sheet: Fig.S8
Width (μm)	Sheet resistance (ohm/sq)	Standard deviation
400	1.27529	0.16754
600	1.21553	0.21782
800	0.96941	0.15819
1000	0.83647	0.00749

## Sheet: FIg.S9
Length ratio relative to A			Angle
B	C		α	β	γ
0.99533	1.01318		91.475	89.072	90.945
1.00455	1.00382		90.674	89.335	89.595
1.02034	1.02507		90.64	89.518	91.59
0.98494	0.98875		90.754	90.445	90.881
1.00413	1.00943		90.749	90.394	90.667
0.99425	0.98582		90.526	89.595	91.001
0.98939	0.99054		89.322	91.326	90.774
0.99708	0.98497		91.035	89.706	91.266
1.00933	1.0179		90.692	90.136	90.401
			90.6519	89.9474	90.7911
